# Supplementary material for: Cost-effective aqueous-phase synthesis of long copper nanowires
Source: Royal Society of Chemistry journal article supplement (doi:10.1039/c5ra15751j), 2015-01-01
Supplement: c5ra15751j1.pdf [file c5ra15751j1.pdf]

## A simple, Large-Scale Aqueous-Phase Route to High-Quality Ultralong Copper Nanowires

Tang Zengmin†, Aasim Shahzad†, Woo-Sik Kim\*, and Taekyung Yu\*

*Department of Chemical Engineering, College of Engineering, Kyung Hee University, Youngin,  
446-701, Korea*

\*Corresponding author. E-mail: [wskim@khu.ac.kr](mailto:wskim@khu.ac.kr) (W.-S. Kim) and [tkyu@khu.ac.kr](mailto:tkyu@khu.ac.kr) (T. Yu)

† These authors contributed equally to this work.

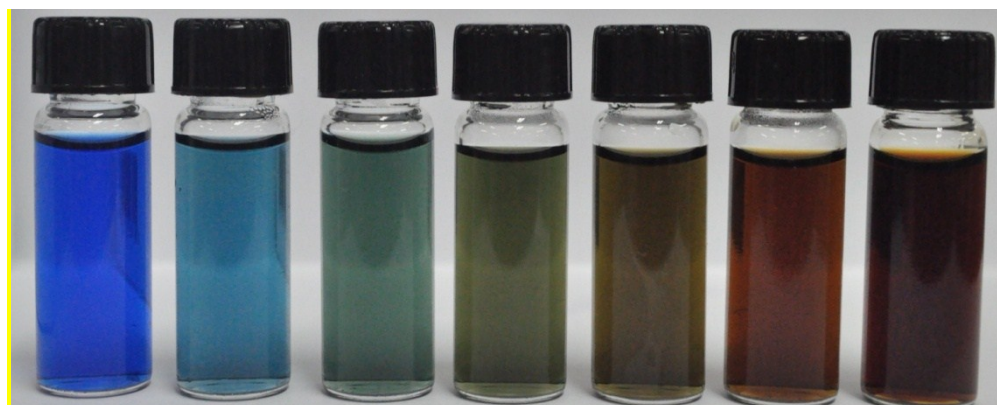

**Fig. S1.** Photographs showing series of color changes in the synthesis of Cu NWs. The color changes takes place from blue (left) to dark brownish-red (right) indicating the reduction of Cu<sup>2+</sup> to Cu<sup>0</sup>.

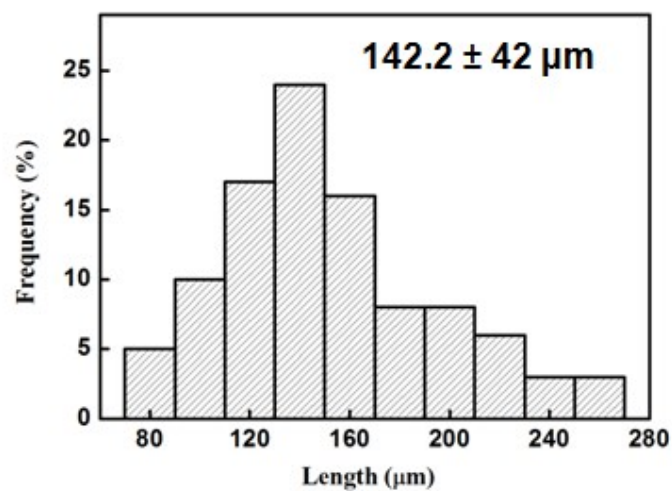

(a)

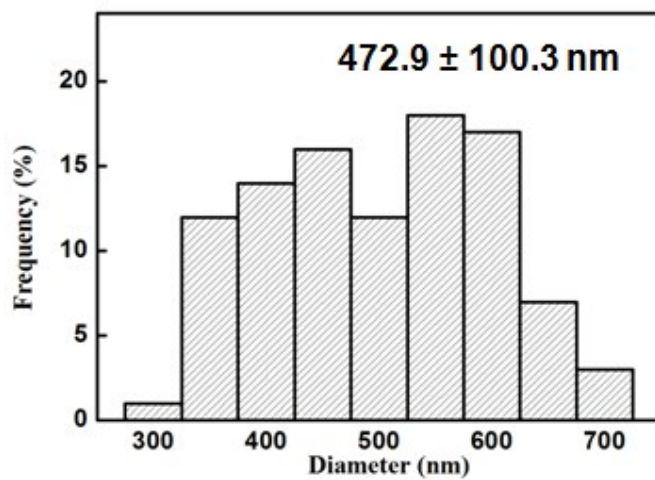

(b)

**Fig. S2.** (a) Average length and (b) Average diameter of Cu NWs as shown in Fig. 1.

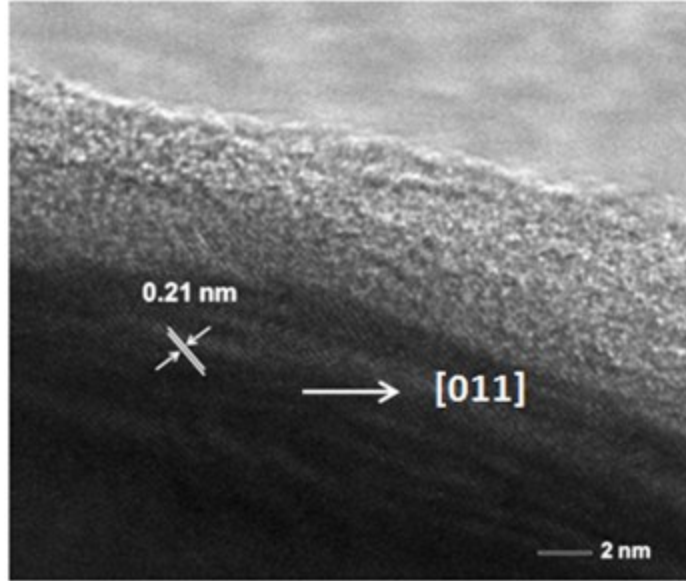

**Fig. S3.** HRTEM image of the Cu NW as shown in Fig. 1(c).

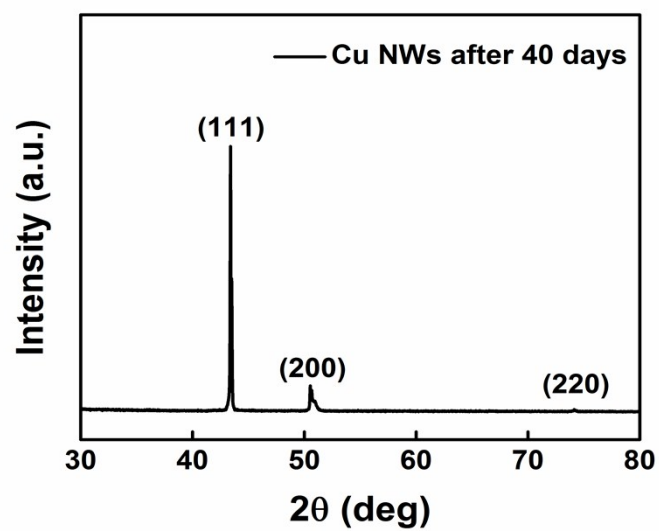

**Fig. S4.** XRD patterns of Cu NWs stored at room temperature for 40 days. The Cu NWs prepared under same conditions as shown in Fig. 1.

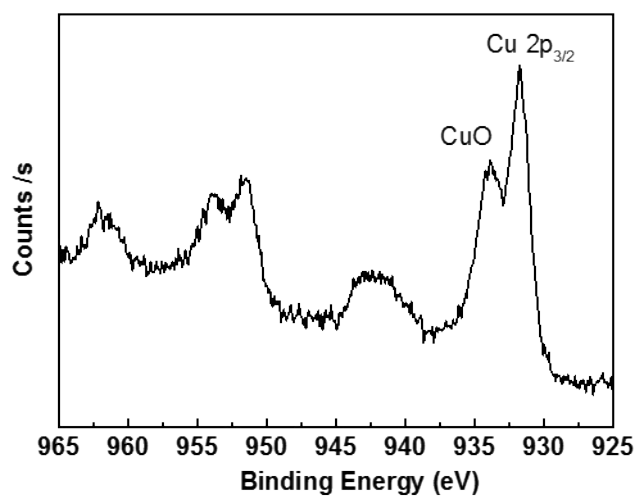

(a)

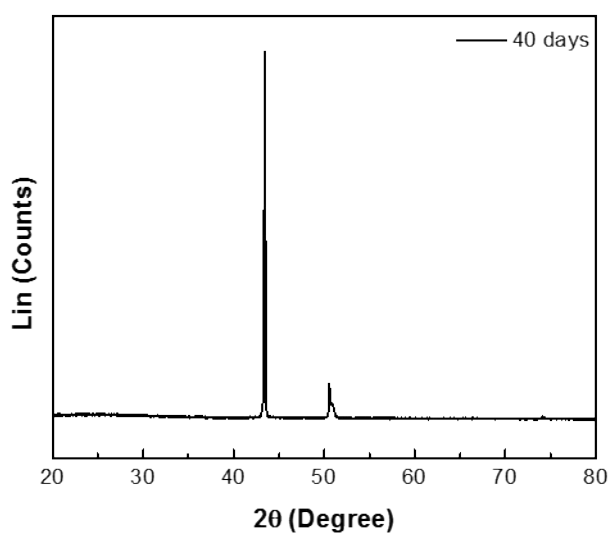

(b)

**Fig. S5.** (a) XPS and (b) XRD results of Cu NWs washed with ethanol and stored 40 days at room temperature.

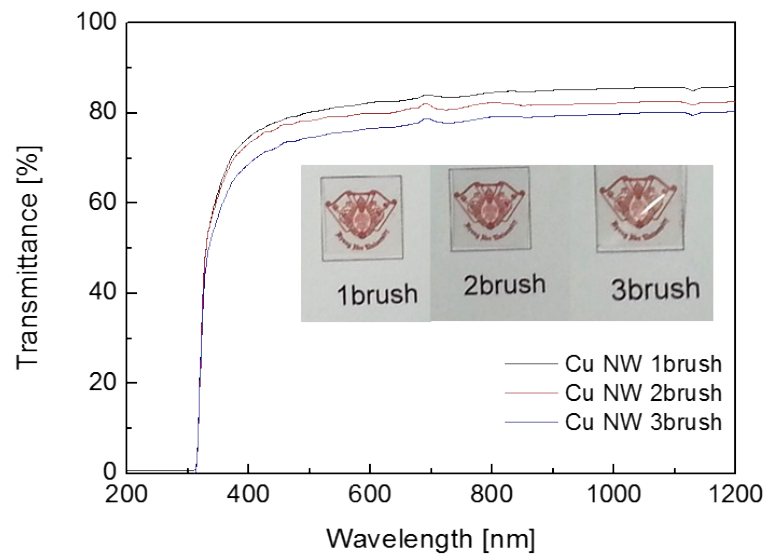

**Fig. S6.** Optical transmittance of Cu nanowires-coated polymer.
